# Supplementary material for: Reduced Graphene Oxide Nanosheet-Decorated Copper Oxide Nanoparticles: A Potent Antifungal Nanocomposite against Fusarium Root Rot and Wilt Diseases of Tomato and Pepper Plants
Source: PubMed Central journal article supplement (PMC7281300; doi:10.3390/nano10051001), 2020-05-24
Supplement: nanomaterials-10-01001-s001.pdf [file nanomaterials-10-01001-s001.pdf]

## Supplementary Materials

# Reduced Graphene Oxide Nanosheet-Decorated Copper Oxide Nanoparticles: A Potent Antifungal Nanocomposite against *Fusarium* Root Rot and Wilt Diseases of Tomato and Pepper Plants

Sozan E. El-Abeid <sup>1</sup>, Yosra Ahmed <sup>1</sup>, José-Antonio Daròs <sup>2</sup> and Mohamed A. Mohamed <sup>1,2,3,\*</sup>

<sup>1</sup> Mycology and Disease Survey Research Department, Plant Pathology Research Institute, Agricultural Research Center, Giza 12619, Egypt; sozanelabeid@yahoo.com (S.E.E.-A.); yosra242@yahoo.com (Y.A.)

<sup>2</sup> Instituto de Biología Molecular y Celular de Plantas (Consejo Superior de Investigaciones Científicas—Universitat Politècnica de València), Avenida de los Naranjos, 46022 Valencia, Spain; jadaros@ibmcp.upv.es

<sup>3</sup> Nanotechnology & Advanced Nano-Materials Laboratory (NANML), Mycology and Disease Survey Research Department, Plant Pathology Research Institute, Agricultural Research Center, Giza 12619, Egypt

\* Correspondence: mohammed\_sharouny@yahoo.com; Tel.: +2-01018274608

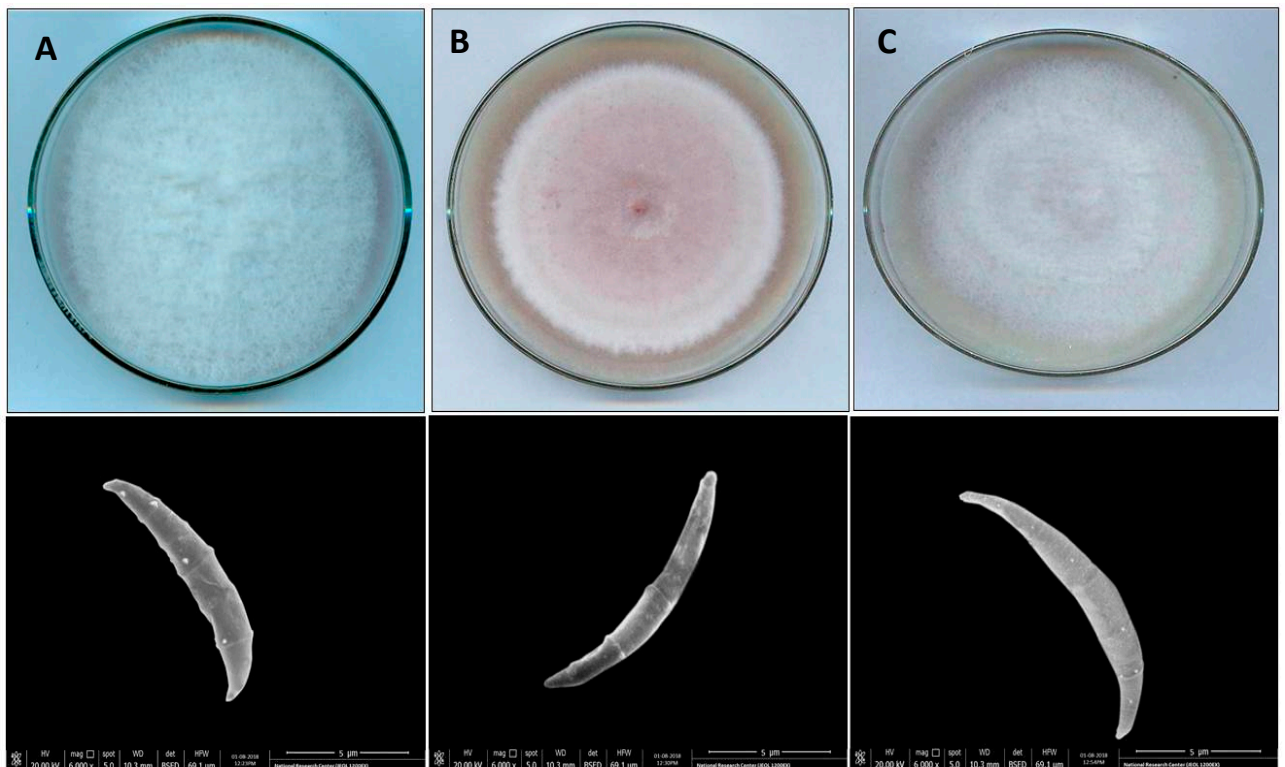

**Figure S1.** The three *Fusarium oxysporum* isolates (A) FORL, (B) FOC1 and (C) FOC2. Mycelial fungal growth on PDA plates (upper row) and SEM images of macroconidia (lower row).

**Figure S2.** Partial sequences of 5.8S ribosomal RNA, complete sequences of internal transcribed spacer 2, and partial sequences of large subunit ribosomal RNA gene for the three FORL, FOC1 and FOC2 *Fusarium oxysporum* isolates.

**FORL**

>MK937617.1 *Fusarium oxysporum* f. sp. *radicis-lycopersici* voucher F1 internal transcribed spacer 1, partial sequence; 5.8S ribosomal RNA gene and internal transcribed spacer 2, complete sequence; and large subunit ribosomal RNA gene, partial sequence  
TGCGGAGGGATCATTACCGAGTTTACAACCTCCCAAACCCCTGTGAACATAACCACTTGTTGCC  
TCGCGGGATCAGCCCCTCCCGGTAAAACGGGACGGCCCGCCAGAGGACCCCTAAACTCTGT  
TTCTATATGTAACCTTCTGAGTAAAACCATAAAATAAATCAAACTTTCAACAACGGATCTCTT  
GGTTCTGGCATCGATGAAGAACGCAGCAAAATGCGATAAGTAATGTGAATTGCAGAATTCAG  
TGAATCATCGAATCTTTGAACGCACATTGCGCCCGCCAGTATTCTGGCGGGCATGCCTGTTC  
GAGCGTCATTTCAACCCTCAAGCACAGCTTGGTGTGGGACTCGCGTTAATTTCGCGTTCCCC  
AAATTGATTGGCGGTACGTCGAGCTTCCATAGCGTAGTAGTAAAACCCCTCGTTACTGGTAA  
TCGTCGCGGCCACGCCGTTAAACCCCAACTTCTGAATGTTGACCTCGGATCAGGTAGGAATA  
CCCGCTGAACTTAA

**FOC1**

>MK937618.1 *Fusarium oxysporum* voucher F2 internal transcribed spacer 1, partial sequence; 5.8S ribosomal RNA gene and internal transcribed spacer 2, complete sequence; and large subunit ribosomal RNA gene, partial sequence  
TGCGGAGGGATCATTACCGAGTTTACAACCTCCCAAACCCCTGTGAACATAACCACTTGTTGCC  
TCGCGGGATCAGCCCCTCCCGGTAAAACGGGACGGCCCGCCAGAGGACCCCTAAACTCTGT  
TTCTATATGTAACCTTCTGAGTAAAACCATAAAATAAATCAAACTTTCAACAACGGATCTCTT  
GGTTCTGGCATCGATGAAGAACGCAGCAAAATGCGATAAGTAATGTGAATTGCAGAATTCAG  
TGAATCATCGAATCTTTGAACGCACATTGCGCCCGCCAGTATTCTGGCGGGCATGCCTGTTC  
GAGCGTCATTTCAACCCTCAAGCACAGCTTGGTGTGGGACTCGCGTTAATTTCGCGTTCCCTC  
AAATTGATTGGCGGTACGTCGAGCTTCCATAGCGTAGTAGTAAAACCCCTCGTTACTGGTAA  
TCGTCGCGGCCACGCCGTTAAACCCCAACTTCTGAATGTTGACCTCGGATCAGGTAGGAATA  
CCCGCTGAACTTAA

**FOC2**

>MK937619.1 *Fusarium oxysporum* voucher F3 internal transcribed spacer 1, partial sequence; 5.8S ribosomal RNA gene and internal transcribed spacer 2, complete sequence; and large subunit ribosomal RNA gene, partial sequence  
TGCGGAGGGATCATTACCGAGTTTACAACCTCCCAAACCCCTGTGAACATAACCACTTGTTGCC  
TCGCGGGATCAGCCCCTCCCGGTAAAACGGGACGGCCCGCCAGAGGACCCCTAAACTCTGT  
TTCTATATGTAACCTTCTGAGTAAAACCATAAAATAAATCAAACTTTCAACAACGGATCTCTT  
GGTTCTGGCATCGATGAAGAACGCAGCAAAATGCGATAAGTAATGTGAATTGCAGAATTCAG  
TGAATCATCGAATCTTTGAACGCACATTGCGCCCGCCAGTATTCTGGCGGGCATGCCTGTTC  
GAGCGTCATTTCAACCCTCAAGCACAGCTTGGTGTGGGACTCGCGTTAATTTCGCGTTCCCC  
AAATTGATTGGCGGTACGTCGAGCTTCCATAGCGTAGTAGTAAAACCCCTCGTTACTGGTAA  
TCGTCGCGGCCACGCCGTTAAACCCCAACTTCTGAATGTTGACCTCGGATCAGGTAGGAATA  
CCCGCTGAACTTAA

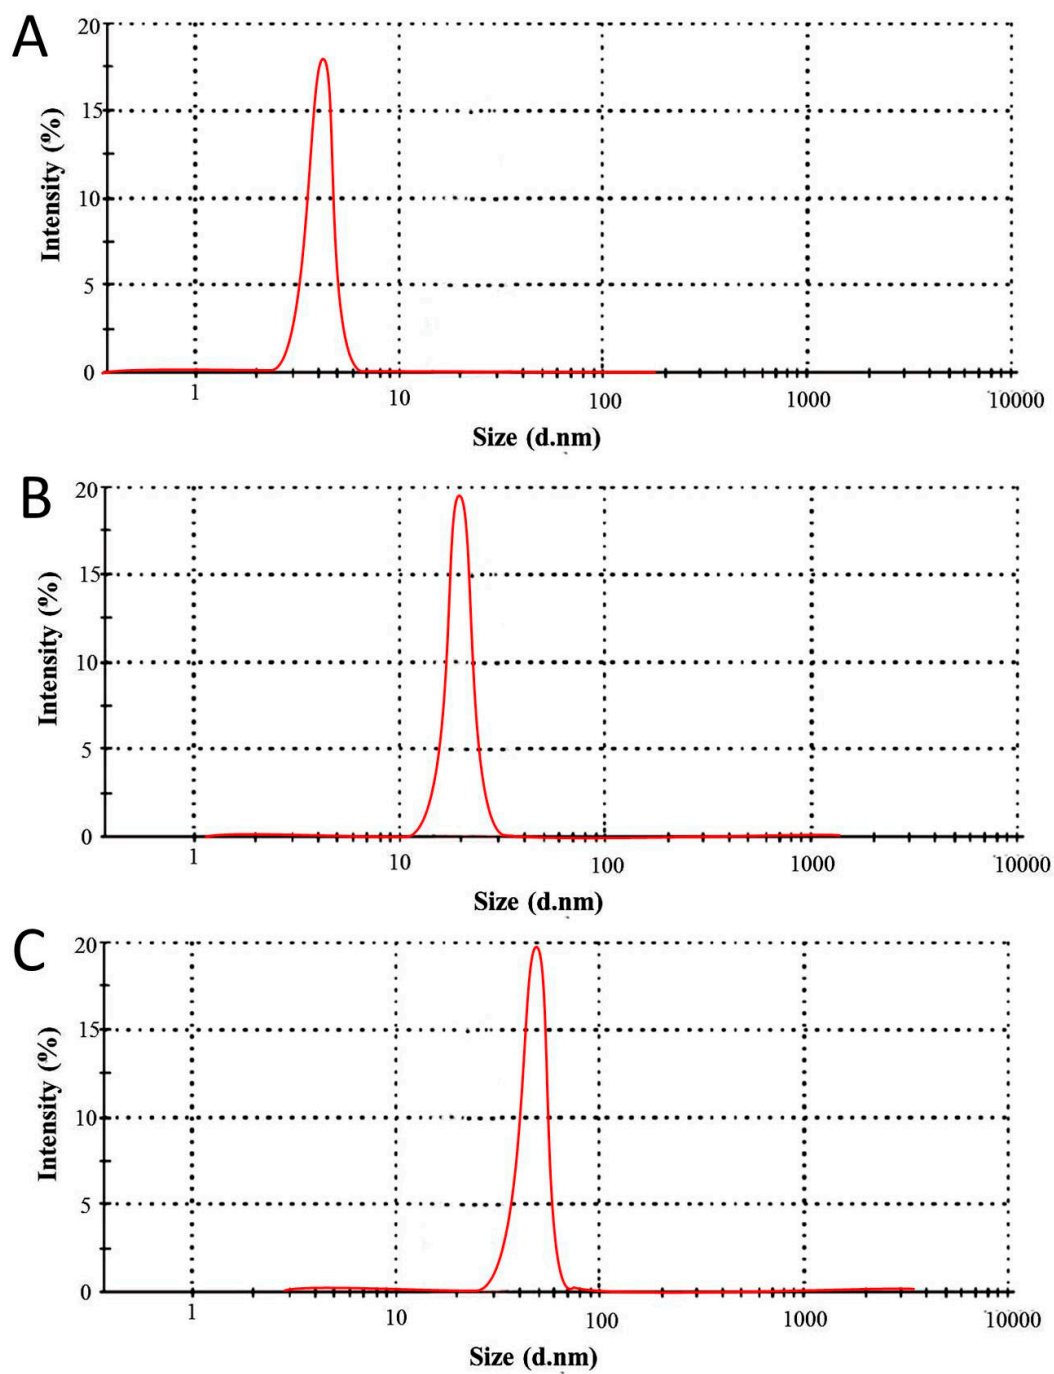

**Figure S3.** Dynamic light scattering (DLS) analysis of the CuO NPs, (A) 5 nm, (B) 20 nm, and (C) 50 nm.
